# Supplementary material for: Different sensitivities of litter decomposition and nutrient release to ultraviolet radiation
Source: Copernicus journal article supplement (doi:10.5194/bg-2018-445), 2018-11-09
Supplement: Supplementary file [file Supprot_information.pdf › Supprot_information.pdf]

*Supplement to*

**Different sensitivities of litter decomposition and nutrient release to ultraviolet radiation**

**Weiming Yan et al.**

Correspondence to: [zhongyqw@foxmail.com](mailto:zhongyqw@foxmail.com)

The copyright of individual parts of the supplement might differ from the CC BY 4.0 License

1 **Part 1** Supplementary figures for the meta-analysis.

2 **Figure S1** Global distribution of the study sites included in the meta-analysis.

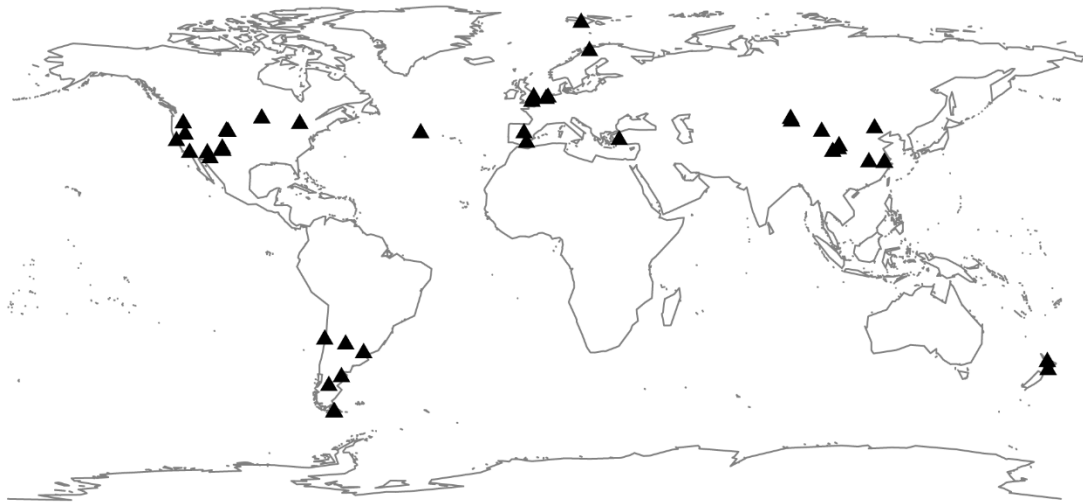

3

**Figure S2** Effects of UV-B and UV-(A+B) attenuation on litter mass loss and remaining nutrients. The black symbols indicate significant differences ( $p < 0.05$ ) between the response ratios (RRs) and zero. The vertical dotted line represents a mean effect size of 0. The sample size for each variable is shown and represents UV-B and UV-(A+B) attenuation from left to right, respectively.

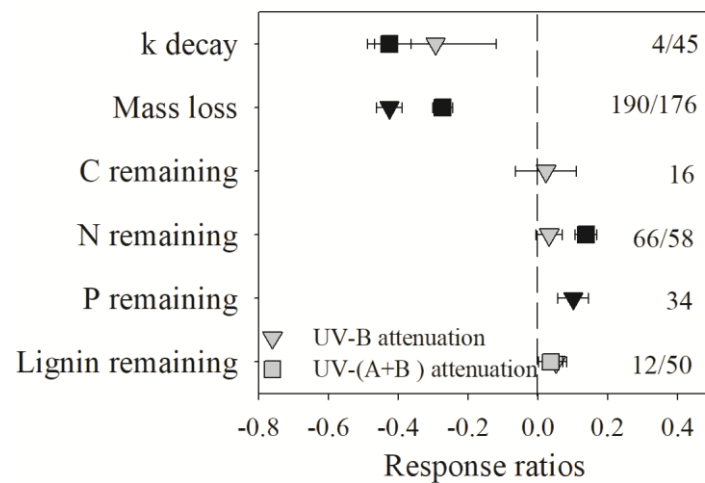

**Figure S3** Relationship between the response ratio (RR) of k decay and the change in ultraviolet (UV) radiation. Values above zero indicate enhancement, whereas those below zero indicate inhibition.

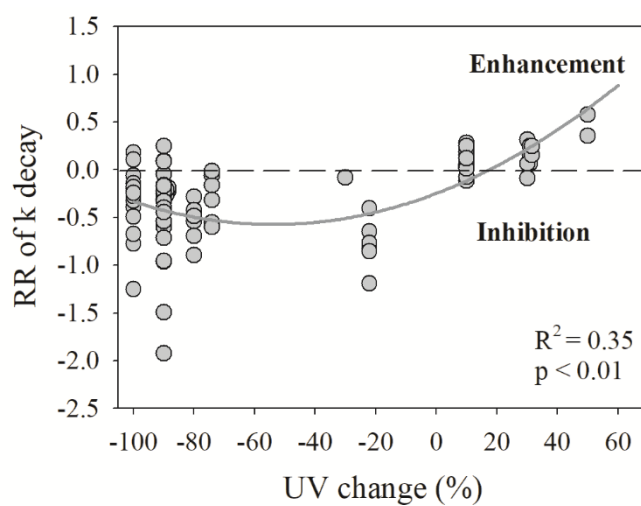

**Figure S4** Model-averaged importance of the predictors of the effects of ultraviolet (UV) radiation on mass loss of litter. The importance is based on the sum of Akaike weights derived from model selection using Akaike's information criteria corrected for small samples. The cutoff was set at 0.8 (dashed line) to differentiate important from nonessential predictors.

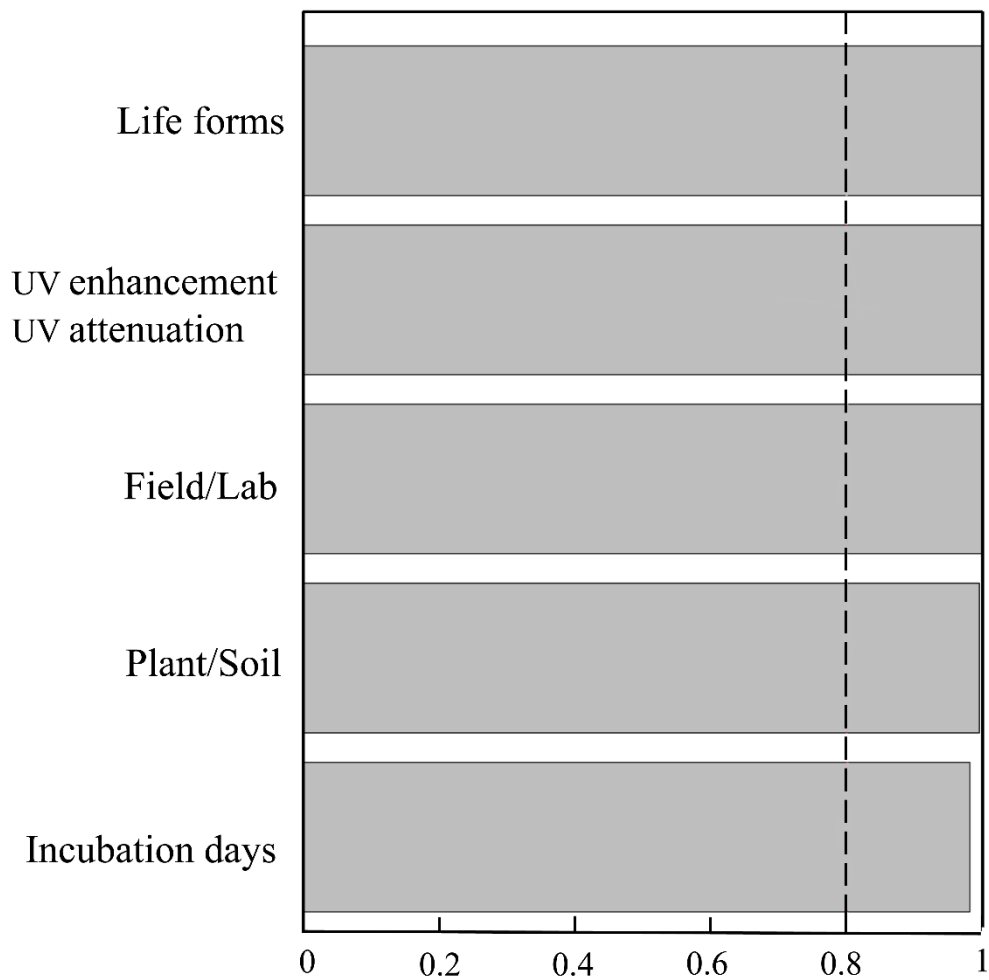

**Figure S5** Effects of UV enhancement and attenuation on litter mass loss and remaining nutrients in grasses, herbs, and broad-leaved and needle-leaved plants. The black symbols indicate significant differences ( $p < 0.05$ ) between the response ratios (RRs) and zero. The vertical dotted line represents a mean effect size of 0.

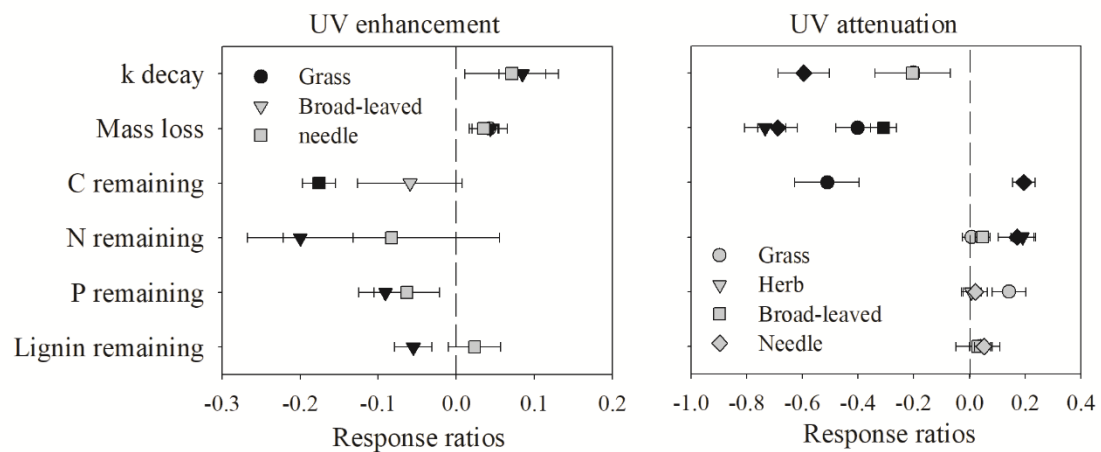

**Figure S6** Relationships between  $k$  decay and mean annual precipitation under ambient environment (a) and between the response ratio (RR) of  $k$  decay and mean annual precipitation under UV attenuation (b).

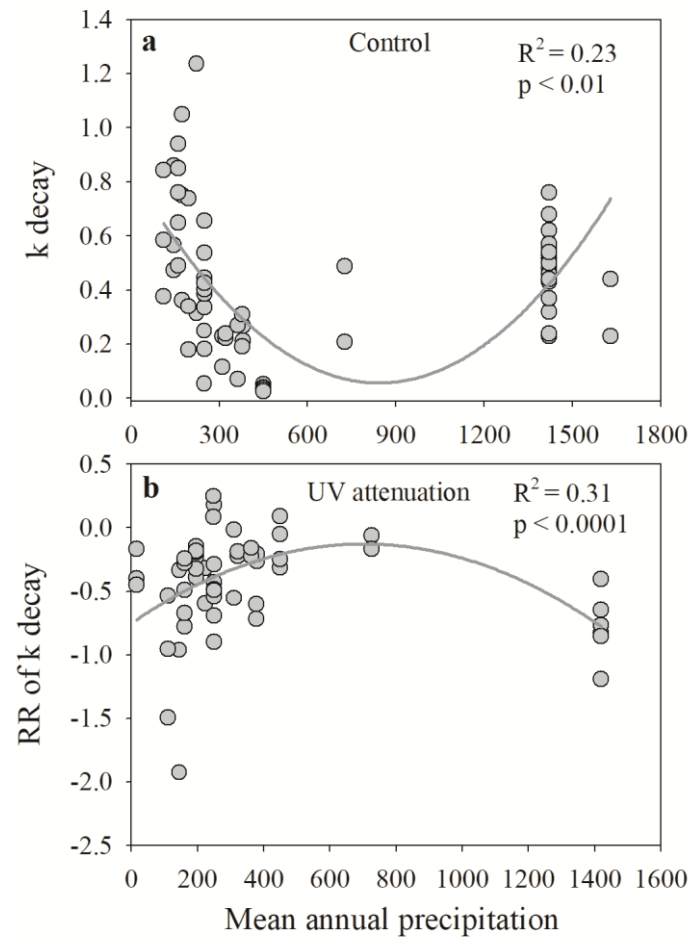

**Figure S7** Effects of ultraviolet (UV) radiation on litter chemical properties. C is carbon, N is nitrogen, and P is phosphorus. The black symbols indicate significant differences ( $p < 0.05$ ) between the response ratios (RRs) and zero. The vertical dotted line represents 0. The sample size for each variable is shown next to the confidence interval (CI) and represents UV enhancement (UV+) and attenuation (UV-) from left to right.

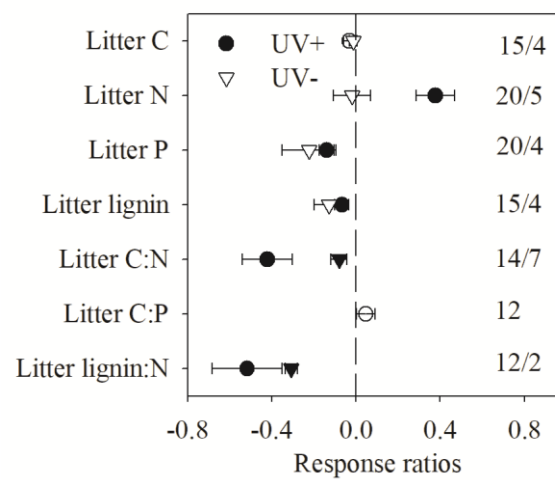



**Figure S8** Relationship between  $k$  decay and the N concentration of litter in ambient environment (CK), UV-attenuation (UV-) and UV-enhancement (UV+) conditions.

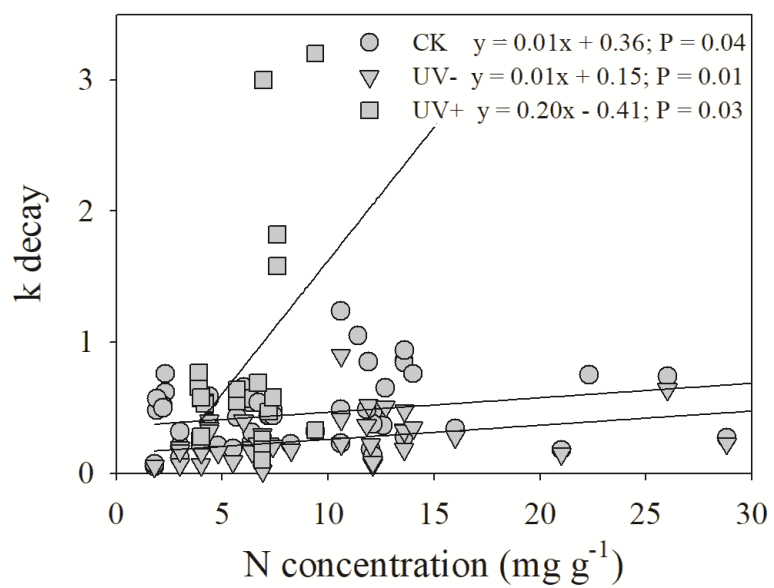

**Part 2:** The 54 papers from which data were extracted for the meta-analysis.

1. Guo B, Bu T, Wang Z, Song X, Liu G, et al. (2013) Effects of UV-B radiation on the leaf litter chemistry and subsequent decomposition of *Elaeocarpus sylvestris*. *Chinese Journal of Ecology* 32: 2314-2319.
2. Song X, Bu T, Zhang S, Jiang H, Wang Z, et al. (2013) Effect of UV-B radiation on the chemical composition and subsequent decomposition of *Cyclobalanopsis glauca* leaf litter. *Environmental Science* 34: 2355-2360.
3. Zhang H, Song X, Zhang Z, Jiang H, Wang Y, et al. (2011) Effects of UV-B radiation on the decomposition of *Cunninghamia lanceolata* leaf litter. *Chinese Journal of Applied Ecology* 22: 845-850.
4. Hoorens B, Aerts R, Stroetenga M (2004) Elevated UV-B radiation has no effect on litter quality and decomposition of two dune grassland species: evidence from a long-term field experiment. *Global Change Biology* 10: 200-208.
5. Newsham KK, Anderson JM, Sparks TH, Splatt P, Woods C, et al. (2001) UV-B effect on *Quercus robur* leaf litter decomposition persists over four years. *Global Change Biology* 7: 479-483.
6. Pancotto VA, Sala OE, Cabello M, Lopez NI, Robson TM, et al. (2003) Solar UV-B decreases decomposition in herbaceous plant litter in Tierra del Fuego, Argentina: potential role of an altered decomposer community. *Global Change Biology* 9: 1465-1474.
7. Pancotto VA, Sala OE, Robson TM, Caldwell MM, Scopel AL (2005) Direct and indirect effects of solar ultraviolet-B radiation on long-term decomposition.

Global Change Biology 11: 1982-1989.

8. Rozema J, Tosserams M, Nelissen HJM, vanHeerwaarden L, Broekman RA, et al. (1997) Stratospheric ozone reduction and ecosystem processes: Enhanced UV-B radiation affects chemical quality and decomposition of leaves of the dune grassland species *Calamagrostis epigeios*. *Plant Ecology* 128: 284-294.
9. Song X, Zhang H, Jiang H, Donaldson LA, Wang H (2013) Influence of elevated UV-B radiation on leaf litter chemistry and subsequent decomposition in humid subtropical China. *Journal of Soils and Sediments* 13: 846-853.
10. Yue M, Li Y, Wang XL (1998) Effects of enhanced ultraviolet-B radiation on plant nutrients and decomposition of spring wheat under field conditions. *Environmental and Experimental Botany* 40: 187-196.
11. Austin AT, Vivanco L (2006) Plant litter decomposition in a semi-arid ecosystem controlled by photodegradation. *Nature* 442: 555-558.
12. Brandt LA, King JY, Hobbie SE, Milchunas DG, Sinsabaugh RL (2010) The Role of Photodegradation in Surface Litter Decomposition Across a Grassland Ecosystem Precipitation Gradient. *Ecosystems* 13: 765-781.
13. Brandt LA, King JY, Milchunas DG (2007) Effects of ultraviolet radiation on litter decomposition depend on precipitation and litter chemistry in a shortgrass steppe ecosystem. *Global Change Biology* 13: 2193-2205.
14. Day TA, Zhang ET, Ruhland CT (2007) Exposure to solar UV-B radiation accelerates mass and lignin loss of *Larrea tridentata* litter in the Sonoran Desert. *Plant Ecology* 193: 185-194.

15. Gallo ME, Porras-Alfaro A, Odenbach KJ, Sinsabaugh RL (2009) Photoacceleration of plant litter decomposition in an arid environment. *Soil Biology and Biochemistry* 41: 1433-1441.
16. Gallo ME, Sinsabaugh RL, Cabaniss SE (2006) The role of ultraviolet radiation in litter decomposition in arid ecosystems. *Applied Soil Ecology* 34: 82-91.
17. Gehrke C, Johanson U, Callaghan TV, Chadwick D, Robinson CH (1995) The impact of enhanced ultraviolet-B radiation on litter quality and decomposition processes in *Vaccinium* leaves from the Subarctic. *Oikos*: 213-222.
18. Henry HAL, Brizgys K, Field CB (2008) Litter Decomposition in a California Annual Grassland: Interactions Between Photodegradation and Litter Layer Thickness. *Ecosystems* 11: 545-554.
19. Kirschbaum MUF, Lambie SM, Zhou H (2011) No UV enhancement of litter decomposition observed on dry samples under controlled laboratory conditions. *Soil Biology and Biochemistry* 43: 1300-1307.
20. Moody SA, Paul ND, Bjorn LO, Callaghan TV, Lee JA, et al. (2001) The direct effects of UV-B radiation on *Betula pubescens* litter decomposing at four European field sites. *Plant Ecology* 154: 27-+.
21. Smith WK, Gao WEI, Steltzer H, Wallenstein MD, Tree R (2010) Moisture availability influences the effect of ultraviolet-B radiation on leaf litter decomposition. *Global Change Biology* 16: 484-495.
22. Song X, Jiang H, Zhang H, Peng C, Yu S (2011) Elevated UV-B radiation did not affect decomposition rates of needles of two coniferous species in subtropical

- China. *European Journal of Soil Biology* 47: 343-348.
23. Song X, Zhang H, Jiang H, Yu S, Zhang Z (2011) Effect of UV-B radiation on the leaf litter decomposition and nutrient release of *Pinus massoniana*. *Acta Ecologica Sinica* 31: 2106-2114.
24. Song X, Zhang H, Chang S, Jiang H, Peng C, et al. (2011) Elevated UV-B radiation increased the decomposition of *Cinnamomum camphora* and *Cyclobalanopsis glauca* leaf litter in subtropical China. *Journal of Soils and Sediments* 12: 307-311.
25. Song X, Zhang H, Jiang H, Yu S (2012) Effects of UV-B Radiation on Leaf Litter Decomposition in Humid Subtropical Region in China. *Scientia Silvae Sinicae* 48: 13-17.
26. Uselman SM, Snyder KA, Blank RR, Jones TJ (2011) UVB exposure does not accelerate rates of litter decomposition in a semi-arid riparian ecosystem. *Soil Biology and Biochemistry* 43: 1254-1265.
27. Austin AT, Ballare CL (2010) Dual role of lignin in plant litter decomposition in terrestrial ecosystems. *Proceedings of the National Academy of Sciences* 107: 4618-4622.
28. Barnes PW, Throop HL, Hewins DB, Abbene ML, Archer SR (2011) Soil Coverage Reduces Photodegradation and Promotes the Development of Soil-Microbial Films on Dryland Leaf Litter. *Ecosystems* 15: 311-321.
29. Lin Y, King JY (2013) Effects of UV exposure and litter position on decomposition in a California Grassland. *Ecosystems* 17: 158-168.

30. Messenger DJ, Fry SC, Yamulki S, McLeod AR (2012) Effects of UV-B filtration on the chemistry and decomposition of *Fraxinus excelsior* leaves. *Soil Biology and Biochemistry* 47: 133-141.
31. Newsham KK, McLeod AR, Roberts JD, Greenslade PD, Emmett BA (1997) Direct effects of elevated UV-B radiation on the decomposition of *Quercus robur* leaf litter. *Oikos* 79: 592-602.
32. Song X, Jiang H, Zhang Z, Zhou G, Zhang S, et al. (2014) Interactive effects of elevated UV-B radiation and N deposition on decomposition of Moso bamboo litter. *Soil Biology and Biochemistry* 69: 11-16.
33. Lambie SM, Kirschbaum MUF, Dando J (2014) No photodegradation of litter and humus exposed to UV-B radiation under laboratory conditions: No effect of leaf senescence or drying temperature. *Soil Biology and Biochemistry* 69: 46-53.
34. Day TA, Guénou R, Ruhland CT (2015) Photodegradation of plant litter in the Sonoran Desert varies by litter type and age. *Soil Biology and Biochemistry* 89: 109-122.
35. Almagro M, Maestre FT, Martínez-López J, Valencia E, Rey A (2015) Climate change may reduce litter decomposition while enhancing the contribution of photodegradation in dry perennial Mediterranean grasslands. *Soil Biology and Biochemistry* 90: 214-223.
36. Almagro M, Martínez-López J, Maestre FT, Rey A (2016) The Contribution of Photodegradation to Litter Decomposition in Semiarid Mediterranean

Grasslands Depends on its Interaction with Local Humidity Conditions, Litter Quality and Position. *Ecosystems* 20: 527-542.

37. Song X, Zhang H, Jiang H, Peng C (2014) Combination of nitrogen deposition and ultraviolet-B radiation decreased litter decomposition in subtropical China. *Plant and Soil* 380: 349-359.
38. Bosco T, Bertiller MB, Carrera AL (2016) Combined effects of litter features, UV radiation, and soil water on litter decomposition in denuded areas of the arid Patagonian Monte. *Plant and Soil* 406: 71-82.
39. Wang J, Yang S, Zhang B, Liu W, Deng M, et al. (2017) Temporal dynamics of ultraviolet radiation impacts on litter decomposition in a semi-arid ecosystem. *Plant and Soil* 419: 71-81.
40. Baker NR, Allison SD (2015) Ultraviolet photodegradation facilitates microbial litter decomposition in a Mediterranean climate. *Ecology* 96: 1994-2003.
41. Gaxiola A, Armesto JJ (2015) Understanding litter decomposition in semiarid ecosystems: linking leaf traits, UV exposure and rainfall variability. *Front Plant Sci* 6: 140.
42. Wang J, Liu L, Wang X, Chen Y (2015) The interaction between abiotic photodegradation and microbial decomposition under ultraviolet radiation. *Global Change Biology* 21: 2095-2104.
43. Newsham KK, Greenslade PD, Kennedy VH, McLeod AR (1999) Elevated UV-B radiation incident on *Quercus robur* leaf canopies enhances decomposition of resulting leaf litter in soil. *Global Change Biology* 5: 403-409.

44. Austin AT, Mendez MS, Ballare CL (2016) Photodegradation alleviates the lignin bottleneck for carbon turnover in terrestrial ecosystems. *Proceedings of the National Academy of Sciences of the United States of America* 113: 4392-4397.
45. Jones AG, Bussell J, Winters A, Scullion J, Gwynn-Jones D (2016) The functional quality of decomposing litter outputs from an Arctic plant community is affected by long-term exposure to enhanced UV-B. *Ecological Indicators* 60: 8-17.
46. Duguay KJ, Klironomos JN (2000) Direct and indirect effects of enhanced UV-B radiation on the decomposing and competitive abilities of saprobic fungi. *Applied Soil Ecology* 14: 157-164.
47. Liu S, Hu R, Cai G, Lin S, Zhao J, et al. (2014) The role of UV-B radiation and precipitation on straw decomposition and topsoil C turnover. *Soil Biology and Biochemistry* 77: 197-202.
48. Zaller JG, Caldwell MM, Flint SD, Ballaré CL, Scopel AL, et al. (2009) Solar UVB and warming affect decomposition and earthworms in a fen ecosystem in Tierra del Fuego, Argentina. *Global Change Biology* 15: 2493-2502.
49. Wu J, Yu Q, Liang D, Zhang J, Li Z, et al. (2015) Effect of light radiation on litter decomposition in alpine meadow of the Tibetan Plateau. *Chinese Journal of Ecology* 34: 2990-2994.
50. Bu T (2013) The indirect effect of UV-B radiation on decomposition of leaf litter of main tree species in subtropical region. Zhejiang A&F University.



51. Huang G, Zhou L, Tang L, Li Y, Zhao H (2013) Photodegradation of plant litter in a temperate desert along a precipitation gradient. *Chinese Journal of Ecology* 32: 2574-2582.
52. Zhang H (2010) The effect of UV-B radiation on decomposition of leaf litter of main tree species in subtropical region. Zhejiang A&F University.
53. Li C (2010) Litter decomposition of *Elymus nutans* and its response to UV-B on the eastern Alpine Meadow of Qinghai-Tibet Plateau. Lanzhou University.
54. Huang G, Li Y (2017) Photodegradation effects are related to precipitation amount, precipitation frequency and litter traits in a desert ecosystem. *Soil Biology and Biochemistry* 115: 383-392.
